# Supplementary material for: Spike Protein Impairs Mitochondrial Function in Human Cardiomyocytes: Mechanisms Underlying Cardiac Injury in COVID-19
Source: MDPI journal article supplement (doi:10.3390/cells12060877), 2023-03-11
Supplement: s1 [file s1]

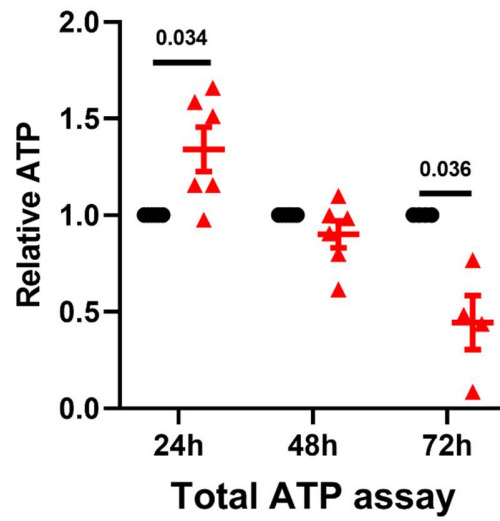

**Supplementary Figure S1.** S1 on total cellular ATP production in AC16 cells. Total cellular ATP in AC16 cells was increased at 24 h, but decreased at 72 h after S1 (1 nM) treatment (n = 6 independent experiments for 24 h and 48 h; n = 4 independent experiment for 72 h). Paired *t* test was performed for statistical analysis;  $p \leq .05$  indicated statistical significance.

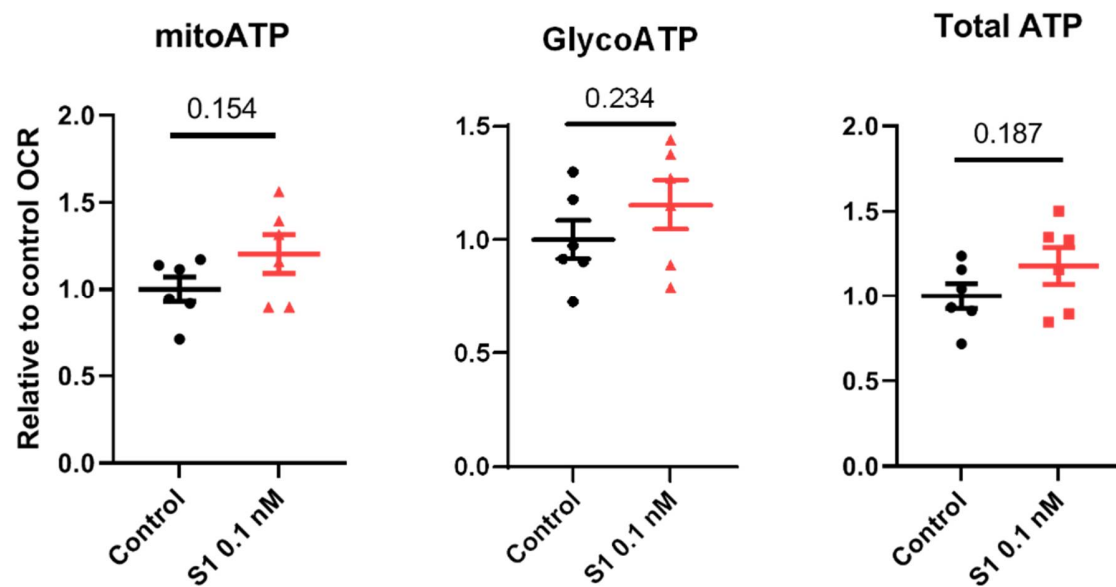

**Supplementary Figure S2.** S1 at lower concentration (0.1 nM) on ATP production rate in AC16 cells. ATP production rate from glycolysis and mitochondrial oxidative phosphorylation was not changed after treatment with S1 for 24 h ( $n = 6$  independent experiments).
